# Supplementary figures and images for: Project STYLE: A Multisite RCT for HIV Prevention Among Youths in Mental Health Treatment
Source: Atypon-hosted journal article supplement (doi:10.1176/appi.ps.201300095), 2014-01-02

**Project STYLE CONSORT**

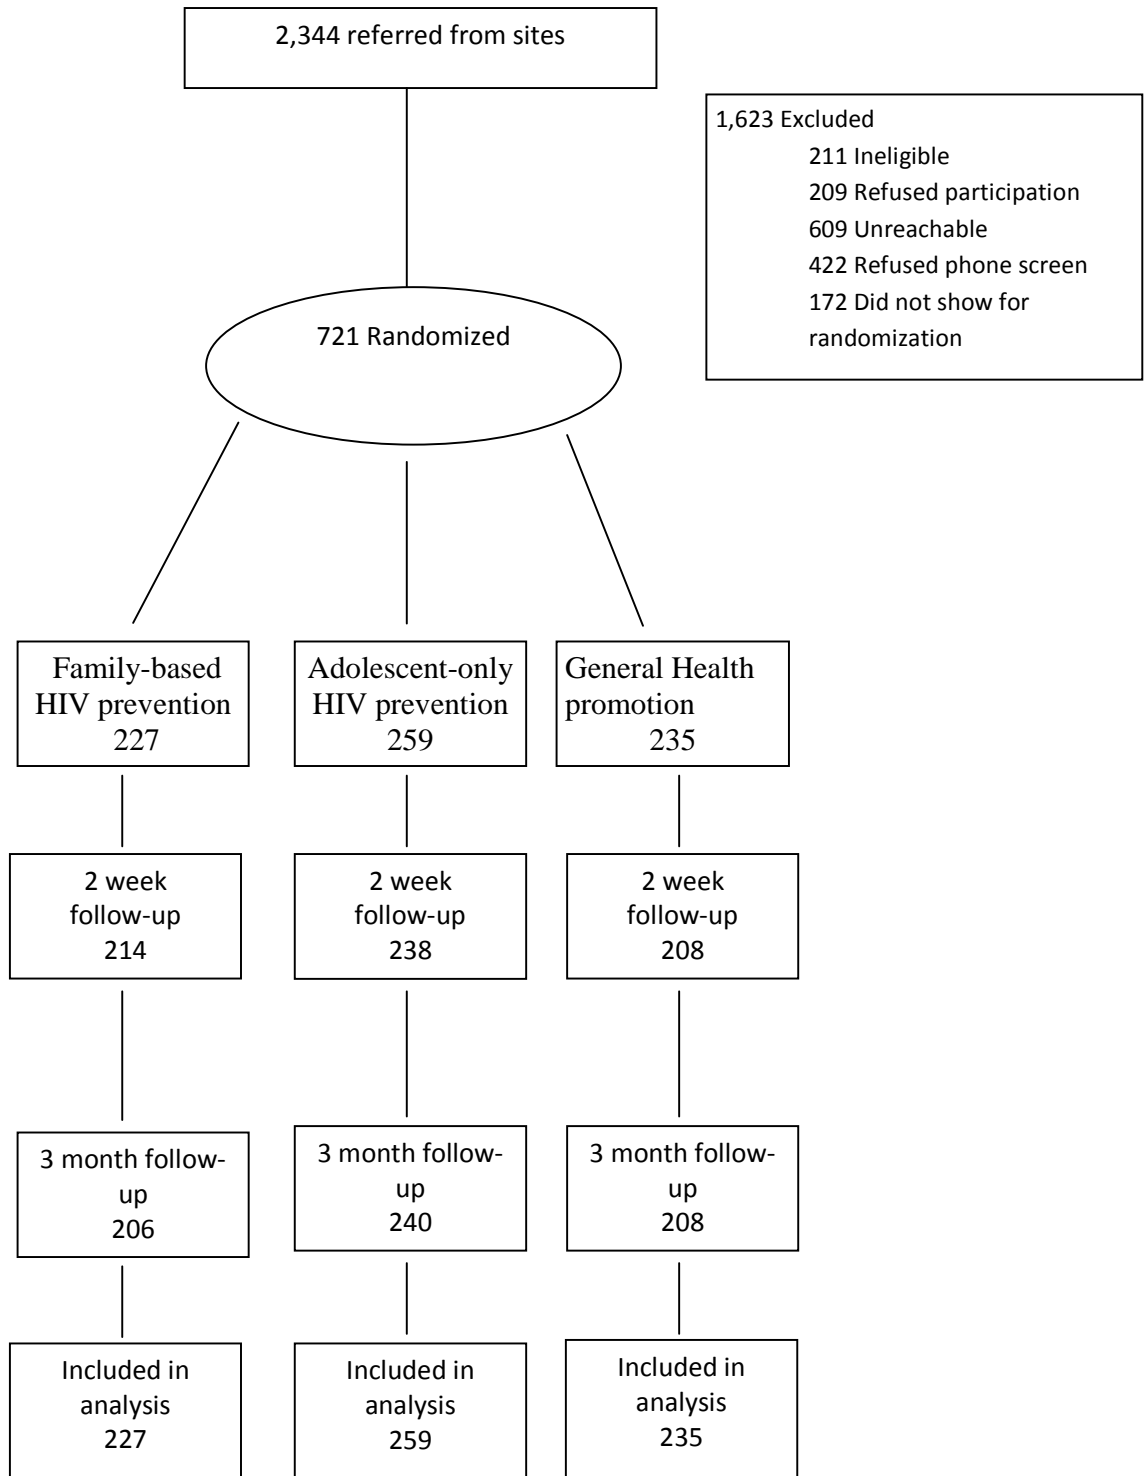

Supplement: 338_ds001.pdf [file 338_ds001.pdf]
